# Supplementary material for: Lifestyle and non-communicable diseases risk factors: Changes in Nutrition, Sleep Patterns, Tobacco Use, Mental Health, and Physical Activity During the First Three Years of University: A Cohort Profile
Source: Research Square preprint supplement (doi:10.21203/rs.3.rs-6710758/v1), 2025-07-02
Supplement: Supplementary file 1 [file fb132198408cef8eb6a5970b.docx]

**Table S1. Details of Different Sections in the Three Steps of a Pilot Study**

| Step | Item | | Details | Scale/ Number of Questions |
| --- | --- | --- | --- | --- |
| Questionnaire  (step1) | **Baseline Characteristics** | | Age, sex, ethnicity, marital status, family residence area, insurance status, field of study, wealth status, parent education, and parent marital status, and number of family members | 11 Items |
| **Tobacco use** | | Ever and current (last 12 months) use of tobacco products (cigarettes, hookah, electronic cigarettes and cannabis), onset age using cigarettes and hookahs, second-hand smoke | STEPwise approach to NCD risk factor surveillance (STEPS) instrument -Iran /10 Items |
| **Alcohol consumption** | | Current (last 12 months) and ever alcohol consumption, the time interval of consumption, and the number of servings consumed during these intervals | STEPwise approach to NCD risk factor surveillance (STEPS) instrument -Iran /7 Items |
| **Nutrition** | | Number of meals, frequency (how many days per week) and quantity of servings of various food groups, including vegetables and fruits, bread and whole grains, meat and protein sources, and dairy products, frequency of consumption of fast food, sugary beverages, and salty processed foods. Salt use, use of supplements and vitamins, dieting (low fat, low calorie, fasting, ketogenic, vegetarian, etc.), and the number of meals consumed at the university | STEPwise approach to NCD risk factor surveillance (STEPS) instrument -Iran/ 17 Items and 4 self-report question |
| **Physical activity** | | Transportation-related activities, recreational activities, and sedentary behavior | Global Physical Activity Questionnaire (GPAQ)/ 11 Items |
| **Medical history** | | Personal and family medical history, | 12 self-report question |
| **Sleep Patterns** | | Sleep quality (subjective sleep quality, sleep latency, sleep duration, habitual sleep efficiency, sleep disturbances, use of sleeping medication, daytime dysfunction), obstructive sleep apnea, restless leg syndrome, insomnia | Sleep Quality Index (PSQI)/ 19 Items |
| STOP-Bang questionnaire / 8 Items |
| Restless Leg Syndrome (RLS) questionnaire/4 Items |
| Insomnia Severity Index questionnaire (ISI) /7 Items |
| **Quality of Life** | | Limitations in physical activities, limitations in social activities, limitations in usual role activities, bodily pain, general mental health, limitations in usual role activities, vitality, general health perceptions, self-reported health. | Short-Form Health Survey Questionnaire (SF-12) /12 Items and a single self-assessment question asking individuals to their current health status |
| **Life Satisfaction** | | Individual’s cognitive judgment of their satisfaction | Satisfaction with Life Scale (SWLS) questionnaire / 5 Items |
| **Mental Health** | | Assessing and monitoring mental health conditions, particularly depression, generalized anxiety | The Patient Health Questionnaire-9 (PHQ-9)/ 9 Questions |
| Generalized Anxiety Disorder-7 (GAD-7)/7 Questions |
| **Smartphone Addiction** | | Self-reported measure for assessment of smartphone addiction severity | Smartphone Addiction Scale (SAS-SV)/10 Questions |
| **Academic Self-efficacy** | | The questionnaire assesses academic self-efficacy using a five-point Likert scale, self-report academic self-efficacy | General Academic Self-Efficacy Scale (GASE)/5 Questions and sing self-assessment question asking individuals to their academic performance |
| Physical Measurements (step2) | **Height** | | Plausible range of 90-220 cm | Standard meter |
| **Weight** | | plausible range of 20-250 kg | digital scale (Innofit, China) |
| **Waist circumference** | | plausible range of 24-230 cm | Cloth tape measure |
| **Neck circumference** | | plausible range of 20-60 cm | Cloth tape measure |
| **Blood pressure** | | Systolic blood pressure (SBP): plausible range of 40-300 mm Hg  Diastolic blood pressure (DBP): plausible range of 30-200 mm Hg | Sphygmomanometers Beurer (BM 20, Germany) |
| **Heart rate** | | plausible range of 30 to 200 beats per minute | Sphygmomanometers Beurer (BM 20, Germany) |
| **Body composition** | **Body fat percentage** | In males aged 18–39, body fat percentage is low if <8.0%, normal if 8.0–19.9%, high if 20.0–24.9%, and very high if >25.0%. In females aged 18–39, body fat percentage is low if <21.0%, normal if 21.0–32.9%, high if 33.0–38.9%, and very high if >39.0%. | OMRON Body Composition Monitor BF511 |
| **Body muscle percentage** | In males aged 18–39, skeletal muscle percentage is low if <33.3%, normal if 33.3–39.3%, high if 39.4–44.0%, and very high if >44.1%. In females aged 18–39, skeletal muscle percentage is low if <24.3%, normal if 24.3–30.3%, high if 30.4–35.3%, and very high if >35.4% |
| Laboratory Tests (step 3), fasting overnight | **CBC, blood glucose, Urea, Creatinine, Uric acid, Triglycerides, Total Cholesterol, HDL-C, LDL-C, AST, ALT** | | - | Roche-Hitachi Cobas C311 auto-analyzer (Roche Diagnostics, Germany) |
| Abbreviations: Complete Blood Count (CBC), High-Density Lipoprotein Cholesterol (HDL-C), Low-Density Lipoprotein Cholesterol (LDL-C), Aspartate transaminase (AST), Alanine transaminase (ALT) | | | | |
